# Supplementary figures and images for: Neuropilin‐1 is present on Foxp3+ T regulatory cell‐derived small extracellular vesicles and mediates immunity against skin transplantation
Source: PubMed Central journal article supplement — J Extracell Vesicles. 2022 Jun 8;11(6):e12237. doi: 10.1002/jev2.12237 (PMC9177693; doi:10.1002/jev2.12237), 2022-06-08

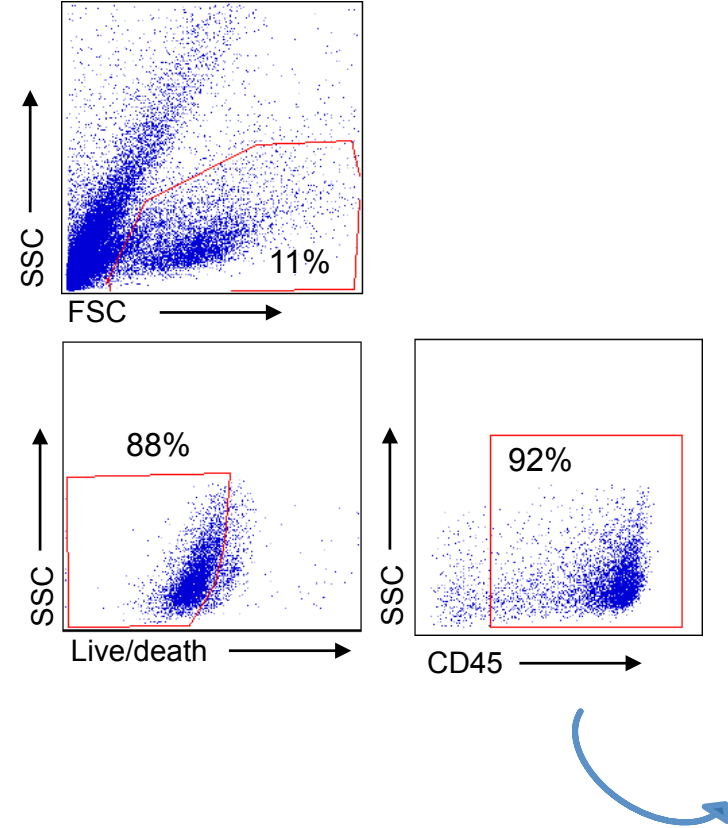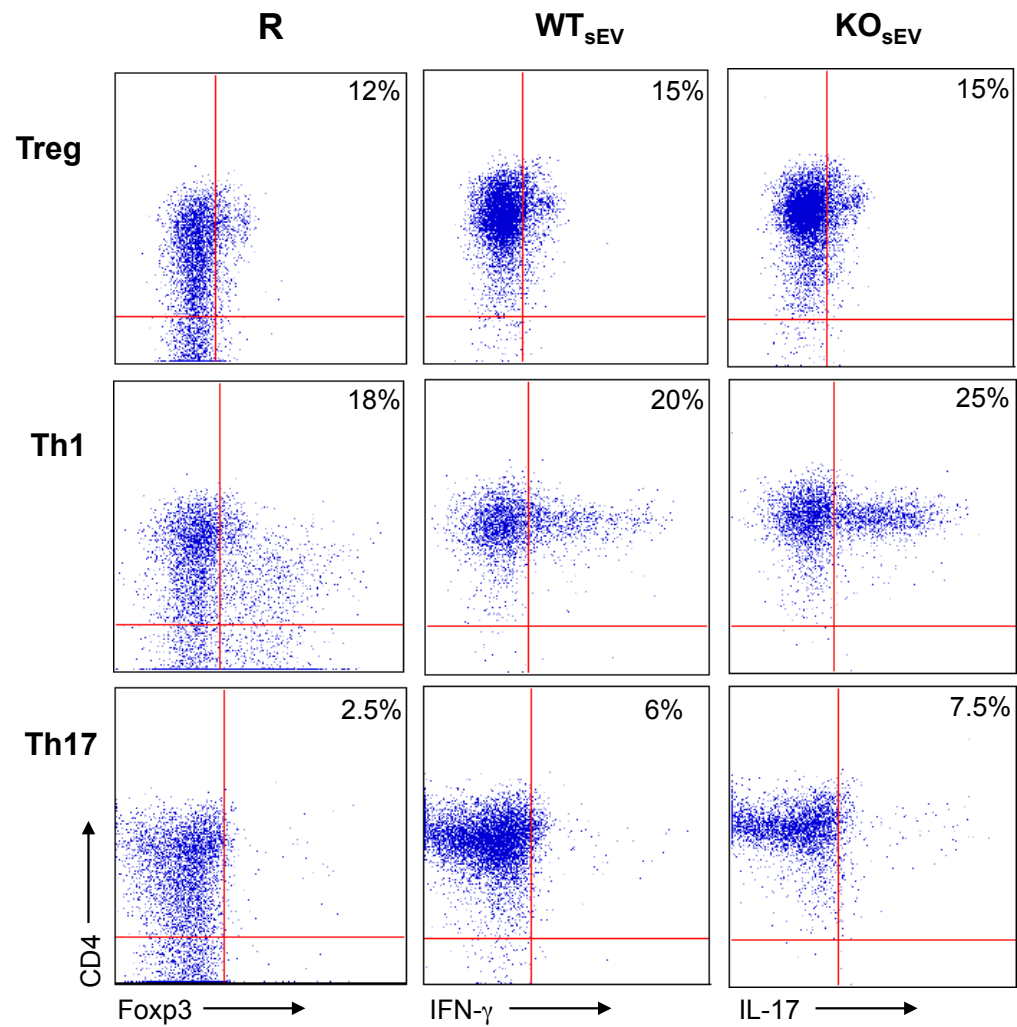

Supplement: JEV2-11-e12237-s001.pdf [file JEV2-11-e12237-s001.pdf]

# Skin grafts

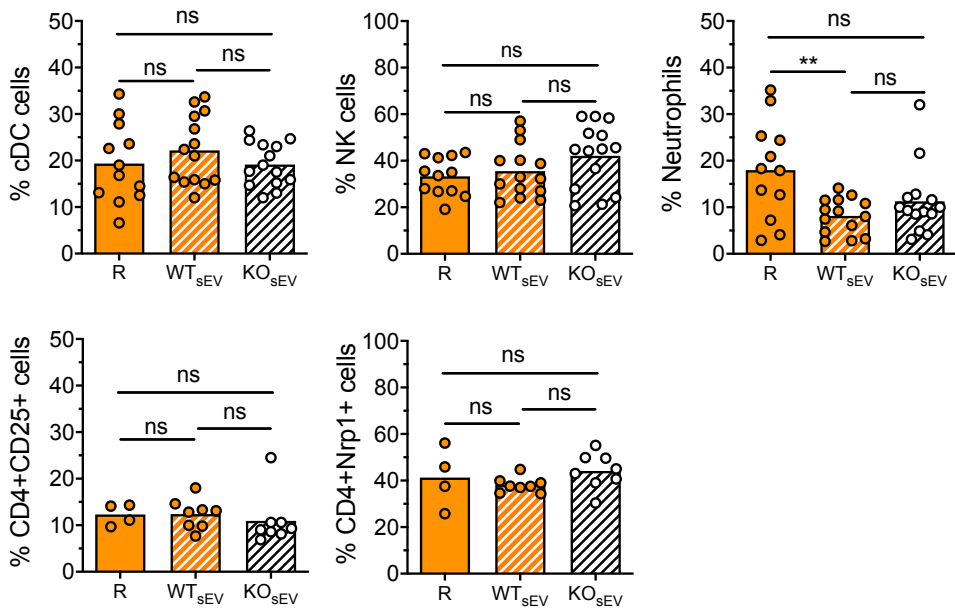

# Draining LN

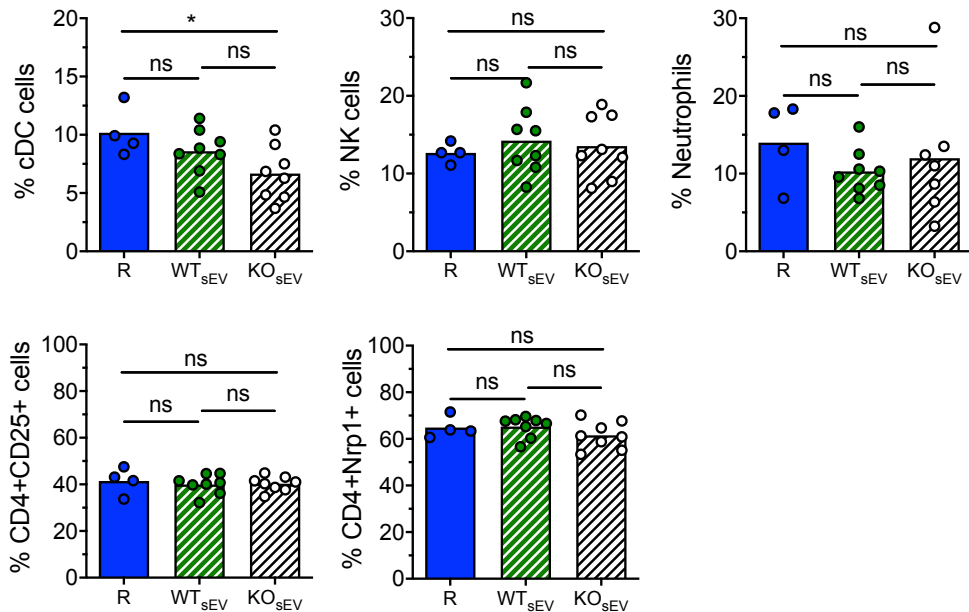

Supplement: JEV2-11-e12237-s002.pdf [file JEV2-11-e12237-s002.pdf]

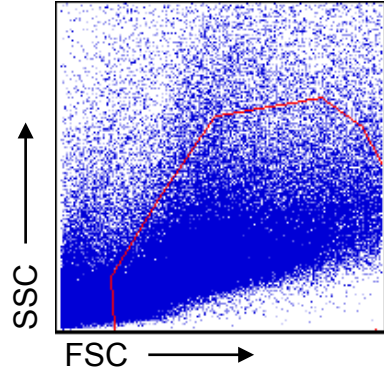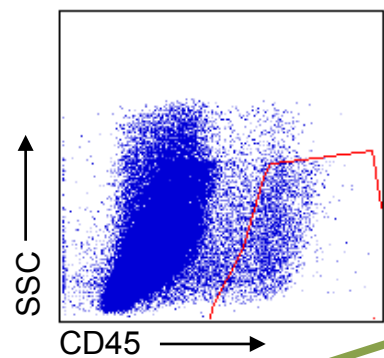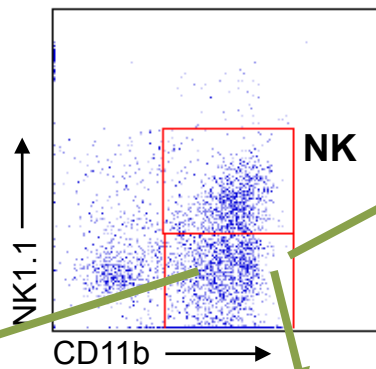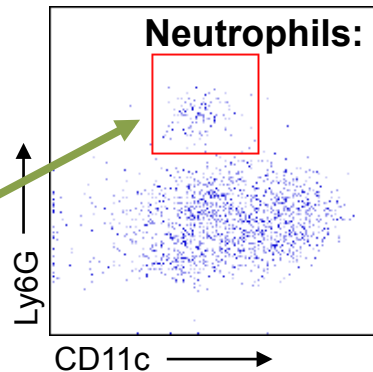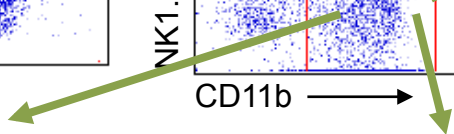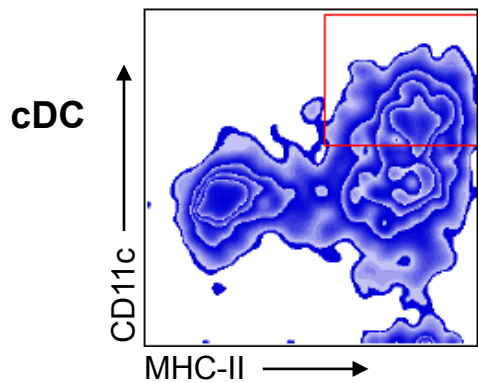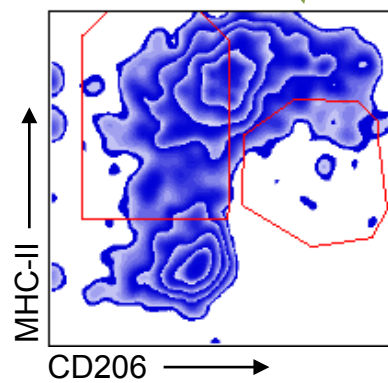

**M1: CD11b+CD206-MHC-II<sup>+/high</sup>**

**M2: CD11b+CD206+MHC-II<sup>low</sup>**

Supplement: JEV2-11-e12237-s003.pdf [file JEV2-11-e12237-s003.pdf]
